1 **Marine mammals and sea turtles listed under the U.S. Endangered Species Act are**  
2 **recovering**

3

4 Abel Valdivia<sup>1,\*</sup>, Shaye Wolf<sup>1</sup>, Kieran Suckling<sup>2</sup>

5

6 <sup>1</sup>Center for Biological Diversity, 1212 Broadway Suite 800, Oakland, CA 94612

7 <sup>2</sup>Center for Biological Diversity, P.O. Box 710, Tucson, AZ 85702

8

9 \*Corresponding author

10 Email: [avaldivia@biologicaldiversity.org](mailto:avaldivia@biologicaldiversity.org)

11 **ABSTRACT**

12 The U.S. Endangered Species Act (ESA) is the world's strongest environmental law protecting  
13 imperiled plants and animals, and a growing number of marine species have been protected  
14 under this law as extinction risk in the oceans has increased. Marine mammals and sea turtles  
15 comprise 36% of the 161 ESA-listed marine species, yet analyses of recovery trends after listing  
16 are lacking. Here we gather the best available annual population estimates for all marine  
17 mammals (n=33) and sea turtles (n=29) listed under the ESA as species. Of these, we  
18 quantitatively analyze population trends, magnitude of population change, and recovery status  
19 for representative populations of 23 marine mammals and 9 sea turtles, which were listed for  
20 more than five years, occur in U.S. waters, and have data of sufficient quality and span of time  
21 for trend analyses. Using generalized linear and non-linear models, we found that 78% of marine  
22 mammals (n=18) and 78% of sea turtles (n=7) significantly increased after listing; 13% of  
23 marine mammals (n=3) and 22% of sea turtles (n=2) showed non-significant changes; while 9%  
24 of marine mammals (n=2), but no sea turtles declined after ESA protection. Overall, species with  
25 populations that increased in abundance were listed for 20 years or more (e.g., large whales,  
26 manatees, and sea turtles). Conservation measures triggered by ESA listing such as ending  
27 exploitation, tailored species management, and fishery regulations, among others, appear to have  
28 been largely successful in promoting species recovery, leading to the delisting of some species  
29 and to increases in most. These findings underscore the capacity of marine mammals and sea  
30 turtles to recover from substantial population declines when conservation actions under the ESA  
31 are implemented in a timely and effective manner.

32

33 **Keywords:** Endangered Species Act, marine mammals, sea turtles, population trends, population  
34 recovery, marine conservation, endangered, threatened, management actions, fishery regulations

35

## 36 **INTRODUCTION**

37 Extinction risk for many marine species is increasing as the world's ocean ecosystems are  
38 degraded by pervasive and increasing anthropogenic stressors [1,2] including over-fishing [3],  
39 habitat loss and degradation [4], pollution [5], and climate change [6,7]. Recent assessments  
40 have identified elevated levels of extinction risk in specific marine taxonomic groups: 14% of  
41 seagrasses [8], 16% of mangroves [9], 33% of reef-building corals [10], at least 25% of sharks  
42 and rays [11], and 11% of billfish and scombrids (e.g., tunas, bonitos, mackerels) [12]. Although  
43 considerably fewer extinctions of marine than terrestrial species have been recorded [1], marine  
44 species have a comparably high extinction risk as terrestrial species [13].

45

46 The Endangered Species Act (ESA) of the United States is the world's strongest environmental  
47 law expressly designed to prevent extinction and promote recovery of imperiled species [14].

48 The strength of the ESA lies in its requirement to base decisions on the best available scientific  
49 information and its enforceable tools to reduce threats, protect habitat, and restore the abundance  
50 and geographic representation of listed species [15]. ESA's tools include critical habitat  
51 designation, recovery planning with concrete and measurable goals, a science-based consultation  
52 process for federal agencies to prevent jeopardizing listed species or adversely modifying their  
53 critical habitat, and a prohibition on killing or harming listed species (16 U.S.C. § 1531 et seq.).  
54 Species protected under the ESA generally receive tailored federal and state conservation efforts  
55 with increased funding for management [16] and thus have better chances for recovery.

56

57 Evaluations of the ESA's efficacy in preventing extinction and fostering recovery have become  
58 more imperative as extinction risks increase [1], available resources for conservation are often  
59 limited and mostly insufficient [17], and attacks on the ESA's effectiveness by political  
60 opponents are escalating, with baseless critiques of the law [18]. Analyses to date of the ESA's  
61 performance have consistently concluded that the ESA is highly effective in preventing species  
62 extinction [19]. After more than 45 years since the law was enacted in 1973, the ESA has  
63 shielded more than 99.5% of the species under its care from extinction [20]. Without the ESA's  
64 protection, an estimated 227 species would have disappeared by 2006 [21].

65

66 The ultimate goal of the ESA is to promote the recovery of imperiled species. Numerous  
67 analyses have found that species status improves with time since listing, i.e., the longer a species  
68 is listed the more likely it is to increase in population abundance [22–24]. Species listed as  
69 threatened tend to respond faster to protection than endangered species because they generally  
70 have higher numbers at the time of listing, requiring relatively shorter time to recover [23,25].  
71 Not surprisingly, species recovery is also associated with effectively implementation of the  
72 ESA's tools, including funding for recovery actions [16,22,24,26,27]; presence of a dedicated  
73 recovery plan [23,28,29]; progress toward completing recovery goals (Abbitt & Scott 2001;  
74 Kerkvliet & Langpap 2007); and designation of critical habitat [23,but see 22,30,24].

75

76 Despite the increasing number of threatened and endangered marine species listed under the ESA  
77 [31], evaluations of the ESA's track record in protecting marine species are lacking. This is  
78 especially evident for marine mammals and sea turtles that comprise a 36% of currently listed

79 marine taxa [31]. Most studies of species recovery under the ESA are broad analyses of  
80 thousands of species [23,32–34] or are tailored to specific terrestrial-related taxa, such as plants  
81 [29], anadromous fish [35,36], amphibians [37], or birds [16,25,38,39]. Recent assessments of  
82 the status of marine mammal stocks in U.S. waters and global analyses of sea turtles categorize  
83 species by current population status, but do not analyze recovery trends since ESA listing  
84 [40,41].

85

86 The objective of our study was to assess how listed marine mammal and sea turtle species are  
87 faring under ESA protections, particularly for species occurring under U.S. jurisdiction where  
88 conservation actions promoted by the law are more robust. Thus, we gather the best available  
89 annual population estimates for all 33 marine mammals and 29 sea turtles listed under the ESA  
90 as species. Of these, we analyze recovery progress of 23 marine mammals and 9 sea turtles,  
91 which were listed for more than five years, reproduce or occur in U.S. waters, and had enough  
92 quality data to assess population trends during ESA protection. We hypothesize that marine  
93 mammals and sea turtles listed for several decades would be more likely to be recovering than  
94 recently listed species. To assess how ESA listing influenced population trends we followed  
95 three steps. First, we selected one representative population for each marine mammal and sea  
96 turtle species. Second, using generalized linear and non-linear models, we calculated species-  
97 specific population-level trends (significantly increased, no significant change, or significantly  
98 decreased) and magnitude of population change for each species after ESA protection. Third, we  
99 discuss conservation actions promoted by ESA listing that may contribute to species recovery,  
100 and illustrate this through three case-study species: the humpback whale in Hawaii and Alaska,  
101 Western Steller sea lion, and the North Atlantic green sea turtle.

102

## 103 **METHODS**

### 104 *ESA listed marine mammal and sea turtle species selection*

105 We reviewed the NMFS and USFWS’s endangered and threatened species database and selected  
106 all marine mammals (n=33) and sea turtles (n=29) currently listed or delisted as “species” under  
107 the ESA (Table 1, and S1 Table). We followed the ESA’s definition of “species”, which includes  
108 both species and subspecies that “interbreed when mature,” as well as distinct population  
109 segments (DPSs) (16 U.S.C. § 1532(16)). A DPS is defined as a vertebrate fish or wildlife  
110 population or a group of populations that is discrete from other populations of the species and is  
111 considered significant in relation to the entire species (61 FR 4722). For example, the humpback  
112 whale (*Megaptera novaeangliae*) is a biologically defined species, but it is currently divided in  
113 14 DPSs under the ESA (81 FR 62259) that are considered different ESA-listed species.

114

115 To determine the influence of ESA conservation measures on species recovery, we selected  
116 extant marine mammal and sea turtle species, listed or delisted, that meet five criteria: (1) ESA-  
117 listed for more than five years (pre-2012) to provide a minimum of post-listing population data  
118 time for conservation measures to be applied; (2) occurrence and reproduction in U.S. waters,  
119 i.e., excluding species that only occur in foreign waters where the ESA provides fewer  
120 protections [42]; (3) with enough reliable abundance data to determine population-level trends,  
121 i.e., at least three data points within 10 years, which is generally recommended for determining  
122 population change in ESA endangered and threatened species (82 FR 24944) and has been used  
123 for marine mammals [43] and sea turtles [44]; (4) with population data covering at least 40% of  
124 the ESA listing period, which we considered adequate for determining population trends after

125 ESA listing; and (5) with a population that numerically represents over 50% of the abundance of  
126 the listed species (e.g., most green sea turtles of the North Atlantic DPS nest in Florida and thus  
127 Florida nest counts were used to represent this DPS). To delimit a population in our study, we  
128 used abundance data consistently collected over time in geographically defined areas such as  
129 stocks under the Marine Mammal Protection Act (MMPA), recovery units and DPSs as managed  
130 under the ESA, and other geographically restricted population units (e.g., ocean basins). As a  
131 result, population trend calculations are likely representative of the status of the entire ESA-listed  
132 species, even though an ESA-listed species may be comprised of several smaller populations.  
133 We identified 32 species that met our selection criteria, totaling 23 marine mammals and nine sea  
134 turtles (Tables 1 and S1). Of the 26 marine mammal and sea turtle species that did not meet our  
135 selection criteria, most (74%) do not occur in U.S. waters.

136  
137 We also evaluated changes in species protection status. Species can be listed under the ESA as  
138 endangered or threatened. The ESA defines an endangered species as “in danger of extinction  
139 throughout all or significant portion of its range” while threatened species are “likely to become  
140 endangered in the foreseeable future throughout all or significant portion of its range” (16 U.S.C.  
141 § 1532(6) and (20)). For several species, the protection status (i.e., endangered or threatened)  
142 changed since the species was first listed at the global population level, and a few species were  
143 divided into DPSs (Table 1 and S1 Table). For the purpose of our study, we used the most  
144 current ESA protection status but the original year that the species was protected (Table 1).

145

146 *Data compilation and availability*

147 We collected information and population-level abundance estimates for ESA-listed marine  
148 mammals and sea turtles from published papers and government reports. Main data sources  
149 included NMFS and USFWS technical memorandum and administrative reports, U.S. marine  
150 mammal stock assessment reports, species recovery plans, five-year status reviews, and primary  
151 sources from peer-reviewed scientific journals (see data in supporting information). When  
152 possible, we collected abundance data up to 2017 or to the most recently available population-  
153 level estimate. For populations that occur and reproduce in both U.S. and foreign waters, we  
154 used datasets from surveys that occurred, at least in part, in waters under U.S. jurisdiction.

155  
156 Population abundance estimates came from a variety of survey methodologies (aerial, land, and  
157 ship-based surveys), mark-recapture population modeling, extrapolated data based on sex ratios,  
158 and photo-identification models (see data in supporting information). For marine mammals,  
159 population abundance comprised the total number of individuals including adults, juveniles, and  
160 pups or calves. For sea turtles, we used number of nests on nesting beaches, number of nesting  
161 females, or number of individuals to determine population trends. The number of nesting females  
162 and number of nests are common metrics for monitoring and evaluating population status of sea  
163 turtles [44].

164  
165 Estimate bias and errors in population abundance obtained from data sources were variable  
166 among species and even within the same species over time. For example, survey effort and  
167 methodologies changed over time and population estimates have been calculated using different  
168 approaches over the years for the same population (e.g., traditional population abundance  
169 models, Bayesian population models, or habitat-based density models). Thus, where available,



170 each data point was accompanied with information on data collection methodology, error  
171 information (e.g., coefficient of variation), and data estimation reliability (see data in supporting  
172 information). Time-series of population abundance for each species were carefully constructed to  
173 ensure all annual data points were derived from adequate and quantitative methodologies.

174

### 175 ***Population trends and magnitude of change***

176 For each marine mammal and sea turtle species, we calculated the population trend (as  
177 percentage change per year) and the magnitude of population change (as percentage change)  
178 after ESA listing based on the predicted distributions from the best and final fitted generalized  
179 linear and non-linear models (Table 2 and S2 Table). Population trajectories were classified as  
180 significantly increasing, non-significant change (non-significant slope), or significantly  
181 decreasing as in Magera et al. [43]. Recovering populations were defined as those that  
182 significantly increased in abundance after ESA listing, independently of whether or not they  
183 were on track to meet the recovery criteria for downlisting or delisting found in recovery plans.  
184 Populations with non-significant trends were not classified as “stable” as in other studies [see  
185 40]. This was because determining population stability overtime requires further assessment of  
186 the accuracy of annual population estimates (e.g., the confidence intervals), which were often not  
187 available. Analysis of the magnitude of population recovery from estimated historical baselines  
188 was also not performed because this has been described elsewhere [43,45,46].

189

### 190 ***Data analysis: Population trajectories and model selection***

191 To explore population trajectories after listing we used several models including linear models  
192 (*lm*), generalized linear models (*glm*), generalized least square models (*gls*), or generalized  
193 additive models (*gam*) in which population abundance estimates were modeled by running time  
194 in years (S2 Table). Because population trends were species specific, we used several family  
195 distributions and error links for each of the population-level models (S2 Table). For each  
196 population, we performed a comprehensive exploratory analysis using all models and possible  
197 combinations of families and links with and without a log transformation of the abundance  
198 estimates. In several *gls* models we added correlation and variance structures to account for  
199 potential temporal autocorrelation among years and variation in the data (S2 Table).  
200 Improvement in model fit was evaluated through theoretical model inference based on Akaike's  
201 Information Criterion (AIC) [47], and comparing adjusted regression (r-squared) parameters  
202 when available [48]. Final model selection was based on a multi-model inference approach using  
203 AICc corrected for small samples [49]. See supporting information for final model details (S2  
204 Table). All calculations and graphing were performed in R version 3.3 [50] using the packages  
205 *nlme v.3.1-131* for generalized least squared models [51]; *gam v.1.14-4* for generalized additive  
206 models [52]; *MuMIn v.1.15.6* for multi-model inference [53]; and *ggplot2 v.2.2.1* for data  
207 visualizations [54]. The dataset with specific data sources and references, and the R code of the  
208 analysis are provided in supporting information.

209

## 210 **RESULTS**

211

### 212 *Status of ESA-listed marine mammal and sea turtle species in U.S. waters*

213

214 Protection status for 10 out of the 32 species analyzed in our study changed since they were first  
215 listed, with eight of the 10 improving in status. Four species were downlisted from endangered to  
216 threatened: the Mexico DPS of humpback whale in 2016; the Florida manatee (*Trichechus*  
217 *manatus latirostris*) and the Antillean manatee (*Trichechus manatus manatus*) subspecies in  
218 2017; and the North Atlantic DPS of green sea turtle in 2016 (Table 1). Four species were  
219 delisted from the ESA because NMFS determined they have recovered: the Eastern North Pacific  
220 Stock of gray whale (*Eschrichtius robustus*) in 1994, two DPSs of humpback whales (Hawaii  
221 and West Indies) in 2016, and the Eastern Pacific DPS of Steller sea lion in 2013 (Table 1). Two  
222 species were uplisted from threatened to endangered: the Western Pacific DPS of Steller sea lion  
223 (*Eumetopias jubatus*) in 1997, and the Central West Pacific DPS of green sea turtle in 2016  
224 (Table 1).

225

226

227 **Table 1 Status of marine mammals and sea turtle species protected under the ESA included in the analysis.** These species are  
 228 listed for more than five years (before 2012), are found exclusively within United States (US) or within both US and foreign (US/F)  
 229 waters, have adequate population data that cover at least 40% of the listing period, and the population represents over 50% of the  
 230 listed species. Distinct population segment (DPS); listing year; ESA status as endangered (E), threatened (T), delisted (D), or status  
 231 change (e.g., T→E); and number of years listed are shown. Year of ESA status change due to down-listing (dl) and up-listing (ul); and  
 232 reason for delisting such as recovered (re) are presented. Several species were listed before 1973 under the Endangered Species  
 233 Preservation Act of 1966 and the Endangered Species Conservation Act of 1969, which were later replaced by the more  
 234 comprehensive Endangered Species Act of 1973. See S1 Table for marine mammals and sea turtle ESA species excluded from the  
 235 analyses. Data as of July 2017 [31].

236

| Common Name            | Scientific Name               | DPS/Stock/Population               | Water | Listed year | ESA status | Years listed | Status change |
|------------------------|-------------------------------|------------------------------------|-------|-------------|------------|--------------|---------------|
| <b>Mammal: Cetacea</b> |                               |                                    |       |             |            |              |               |
| Beluga whale           | <i>Delphinapterus leucas</i>  | Cook Inlet, Alaska DPS             | US    | 2008        | E          | 9            | –             |
| Blue whale             | <i>Balaenoptera musculus</i>  | Eastern North Pacific Stock        | US/F  | 1970        | E          | 47           | –             |
| Bowhead whale          | <i>Balaena mysticetus</i>     | Western Artic Stock                | US/F  | 1970        | E          | 47           | –             |
| Fin whale              | <i>Balaenoptera physalus</i>  | California/Oregon/Washington Stock | US/F  | 1970        | E          | 47           | –             |
|                        |                               | Western North Atlantic Stock       | US/F  | 1970        | E          | 47           | –             |
| Gray whale             | <i>Eschrichtius robustus</i>  | Eastern North Pacific Stock        | US/F  | 1970        | E→D        | 24           | 1994 –re      |
|                        |                               | Western North Pacific Stock        | US/F  | 1970        | E          | 47           | –             |
| Humpback whale         | <i>Megaptera novaeangliae</i> | Central America DPS                | US/F  | 1970        | E          | 47           | –             |
|                        |                               | Hawaii DPS                         | US    | 1970        | E→D        | 46           | 2016 –re      |
|                        |                               | Mexico DPS                         | US/F  | 1970        | E→T        | 47           | 2016 –dl      |
|                        |                               | West Indies DPS                    | US/F  | 1970        | E→D        | 46           | 2016 –re      |

|                                 |                                       |                                      |      |      |     |    |          |
|---------------------------------|---------------------------------------|--------------------------------------|------|------|-----|----|----------|
| Killer whale                    | <i>Orcinus orca</i>                   | Southern Resident DPS                | US   | 2005 | E   | 12 | –        |
| N. Atlantic right whale         | <i>Eubalaena glacialis</i>            | North Atlantic Population            | US/F | 1970 | E   | 47 | –        |
| Sei whale                       | <i>Balaenoptera borealis</i>          | Eastern North Pacific Stock          | US/F | 1970 | E   | 47 | –        |
|                                 |                                       | Nova Scotia Stock                    | US/F | 1970 | E   | 47 | –        |
| <b>Mammal: Carnivora</b>        |                                       |                                      |      |      |     |    |          |
| Guadalupe fur seal              | <i>Arctocephalus townsendi</i>        | Guadalupe Island Population          | US/F | 1985 | T   | 32 | –        |
| Hawaiian monk seal              | <i>Neomonachus schauinslandi</i>      | NW Hawaiian Islands Index Population | US   | 1976 | E   | 41 | –        |
| Northern sea otter              | <i>Enhydra lutris kenyoni</i>         | Southwest Alaska DPS                 | US   | 2005 | T   | 12 | –        |
| Southern sea otter              | <i>Enhydra lutris nereis</i>          | California Population                | US   | 1977 | T   | 40 | –        |
| Steller sea lion                | <i>Eumetopias jubatus</i>             | Western DPS                          | US/F | 1990 | T→E | 27 | 1997 –ul |
|                                 |                                       | Eastern DPS                          | US/F | 1990 | E→D | 23 | 2013 –re |
| <b>Mammal: Sirenia</b>          |                                       |                                      |      |      |     |    |          |
| Florida manatee                 | <i>Trichechus manatus latirostris</i> | Florida Population (subsp.)          | US   | 1967 | E→T | 50 | 2017 –dl |
| Antillean manatee               | <i>Trichechus manatus manatus</i>     | Puerto Rico Population (subsp.)      | US/F | 1970 | E→T | 47 | 2017 –dl |
| <b>Reptile: Sea Turtles</b>     |                                       |                                      |      |      |     |    |          |
| Green turtle                    | <i>Chelonia mydas</i>                 | Central North Pacific DPS            | US/F | 1978 | T   | 39 | –        |
|                                 |                                       | Central West Pacific DPS             | US/F | 1978 | T→E | 39 | 2016 –ul |
|                                 |                                       | North Atlantic DPS                   | US/F | 1978 | E→T | 39 | 2016 –dl |
|                                 |                                       | South Atlantic DPS                   | US/F | 1978 | T   | 39 | –        |
| Hawksbill turtle                | <i>Eretmochelys imbricata</i>         | Atlantic Population                  | US/F | 1970 | E   | 47 | –        |
|                                 |                                       | Pacific Population                   | US/F | 1970 | E   | 47 | –        |
| Kemp's ridley turtle            | <i>Lepidochelys kempii</i>            | Texas Population                     | US/F | 1970 | E   | 47 | –        |
| Leatherback turtle <sup>b</sup> | <i>Dermochelys coriacea</i>           | Atlantic DPS                         | US/F | 1970 | E   | 47 | –        |
| Loggerhead turtle               | <i>Caretta caretta</i>                | Northwest Atlantic Ocean DPS         | US/F | 1978 | T   | 39 | –        |

237 <sup>a</sup>The leatherback sea turtle is managed independently in the Atlantic and Pacific Oceans as DPSs. Only Atlantic leatherback sea turtles nest on U.S. beaches,

238 Pacific leatherback were excluded from the analysis.

239

240

241 ***Population trends and magnitude of change***

242 Overall, approximately 78% of marine mammals (18 out of 23) and 78% of sea turtles (7 out of  
243 9) analyzed that met our selection criteria significantly increased in abundance after ESA listing  
244 (Fig 1A). Representative populations of three marine mammals (~13%) and two sea turtles  
245 (~22%) experienced non-significant change. Only two marine mammals (~9%), but no sea  
246 turtles significantly declined after ESA protection (Fig 1A). Marine mammals and sea turtles  
247 with populations that significantly increased were listed between two to five decades and  
248 increasing population trends was positively associated with time since listing. In contrast, there  
249 was no association with listing time for populations that showed non-significant trend or that  
250 declined in abundance (Fig 1B; Table 2). Out of the 25 species with populations that  
251 significantly increased, 52% were listed as endangered, 32% as threatened, and 16% were  
252 delisted, indicating that population increases occurred independent of whether a species was  
253 classified as threatened or endangered (Tables 1 and 2).

254

255 **Fig 1. Number and percentage of marine mammal and sea turtle species protected under**  
256 **the ESA** with population trends that significantly increased (inc), non-significant change (nsc),  
257 and significantly decreased (dec) after listing. **(A)** Calculations were based on representative  
258 populations of 23 marine mammal and 9 sea turtle ESA listed species that met our selection  
259 criteria. **(B)** Relationship between population trend and time since listing for marine mammals  
260 (blue circles) and sea turtles (green circles) species. Black line is the median and grey circle the  
261 mean.

262

263

264 **Table 2. Linear model and ANOVA results of the relationship between time since ESA**  
265 **listing and population trends (increasing, non-significant, decreasing) for marine mammal**  
266 **and sea turtle species.** The decreasing trend was used as reference for the linear model.  
267 Significant codes are ‘\*\*\*’ 0.01 and ‘\*’ 0.05.

268

| <b>Linear model</b>   | <b>Estimate</b> | <b>Std. Error</b> | <b>t value</b> | <b>Pr(&gt; t )</b> |
|-----------------------|-----------------|-------------------|----------------|--------------------|
| (Intercept)           | 26.500          | 7.327             | 3.617          | 0.00112 **         |
| Non-significant trend | 2.700           | 8.669             | 0.311          | 0.75769            |
| Increasing trend      | 16.020          | 7.614             | 2.104          | 0.04417 *          |
| <b>ANOVA</b>          | <b>DF</b>       | <b>Mean Sq</b>    | <b>F value</b> | <b>Pr(&gt;F)</b>   |
| Trend                 | 2               | 548.17            | 5.1057         | 0.01260 *          |
| Residuals             | 29              | 107.36            |                |                    |

269

270 Most marine mammals that significantly increased after ESA listing had substantial population  
271 growth (Figs. 2 and 3; Table 3). Several populations of large whale species increased in numbers  
272 from ~3% to ~43% per year, often doubling to quadrupling their initial population estimates  
273 (Table 3). For example, all four DPSs of humpback whales analyzed in our study showed  
274 substantial population increases (Fig 2; Table 3). In fact, the Hawaiian DPS of humpback whale  
275 reached over 10,100 individuals in 2005 from only 800 individuals estimated in 1979 (Fig 2;  
276 Table 3). NMFS subsequently delisted it from the ESA in 2016 (Table 1). While most large  
277 whale populations trended toward recovery, the critically endangered population of the North  
278 Atlantic right whale (*Eubalaena glacialis*) increased at 4.2% per year from 270 to 481 whales  
279 between 1990 and 2010 , but declined to an estimated 451 whales between 2010 to 2016 (Fig 2;  
280 Table 3 and S2 Table). At least 17 individuals died in 2017, representing nearly 4% of the entire  
281 population (Table 3 and S2 Table).

282

283

284 **Table 3. Population trends and magnitude of population change of selected marine mammal and sea turtle species protected**  
 285 **under the ESA.** Population (Pop.) trends (significantly increased↑, non-significant change →, significantly decreased↓) are based on  
 286 species-specific models and time periods are shown. Current population trends (% per year) and magnitude of population change (%)  
 287 were calculated based on available data after listing. First and last population abundance estimates for the time period are shown for  
 288 reference.

289

| ESA Species (DPS/Stock/Location)                                  | Time period (years) | Pop. trend (sign) | Pop. trend (% yr <sup>-1</sup> ) | Pop. change (%) | First pop. estimate (No.) | Last pop. estimate (No.) |
|-------------------------------------------------------------------|---------------------|-------------------|----------------------------------|-----------------|---------------------------|--------------------------|
| <b>Cetacean</b>                                                   |                     |                   |                                  |                 |                           |                          |
| Beluga whale (Cook Inlet DPS)                                     | 08-14               | →                 | -0.44                            | -8.8            | 375                       | 340                      |
| Blue whale (Eastern North Pacific Stock)                          | 79-14               | ↑                 | +4.99                            | +174.5          | 705                       | 2,000                    |
| Bowhead whale (Western Arctic Stock)                              | 78-11               | ↑                 | +8.34                            | +273.1          | 4,765                     | 16,892                   |
| Fin whale (California, Oregon, Washington Stock)                  | 91-14               | ↑                 | +13.34                           | +306.9          | 1,744                     | 9,892                    |
| Fin whale (Western North Atlantic Stock)                          | 92-11               | →                 | -0.75                            | -14.2           | 2,700                     | 1,618                    |
| Gray whale (Eastern North Pacific Stock)                          | 70-11               | ↑                 | +1.28                            | +52.6           | 14,553                    | 20,990                   |
| Gray whale (Western North Pacific Stock)                          | 94-12               | ↑                 | +6.22                            | +111.9          | 66                        | 140                      |
| Humpback whale (Central America DPS, California + Oregon)         | 85-14               | ↑                 | +15.18                           | +440.2          | 300                       | 1,403                    |
| Humpback whale (Hawaii DPS, Hawaii winter)                        | 79-05               | ↑                 | +42.86                           | +1,114.3        | 800                       | 10,103                   |
| Humpback whale (Mexico DPS, Southeast Alaska to Alaska Peninsula) | 86-11               | ↑                 | +13.40                           | +334.4          | 393                       | 1,115                    |
| Humpback whale (West Indies DPS)                                  | 79-05               | ↑                 | +3.00                            | +78.0           | 7,260                     | 12,312                   |
| Killer whale (Southern Resident DPS)                              | 05-17               | ↓                 | -0.93                            | -11.2           | 88                        | 76                       |
| North Atlantic right whale (North Atlantic)                       | 90-10               | ↑                 | +4.20                            | +84.0           | 270                       | 481                      |
|                                                                   | 10-16               | ↓                 | -1.05                            | -6.3            | 481                       | 451                      |
| Sei whale (Eastern North Pacific Stock)                           | 96-14               | ↑                 | +33.09                           | +595.6          | 150                       | 864                      |
| Sei whale (Nova Scotia Stock)                                     | 70-11               | ↑                 | +1.98                            | +81.4           | 93                        | 357                      |
| <b>Carnivora</b>                                                  |                     |                   |                                  |                 |                           |                          |



|                                                                                                                            |       |   |         |            |        |        |
|----------------------------------------------------------------------------------------------------------------------------|-------|---|---------|------------|--------|--------|
| Guadalupe fur seal (Guadalupe Island, Mexico)                                                                              | 85-15 | ↑ | + 14.84 | + 905.4    | 2,017  | 20,000 |
| Hawaiian monk seal (NW Hawaiian Islands)                                                                                   | 85-13 | ↓ | - 2.04  | - 57.0     | 1,997  | 789    |
| (NW Hawaiian Islands)                                                                                                      | 13-16 | ↑ | + 5.72  | + 22.9     | 789    | 968    |
| Northern sea otter (Southwest Alaska DPS,<br>Attu, Amchitaka, Adak, Kiska Islands)                                         | 05-11 | → | + 5.06  | + 30.3     | 687    | 863    |
| Southern sea otter (California)                                                                                            | 79-17 | ↑ | + 3.02  | + 114.7    | 1,443  | 2,688  |
| Steller sea lion (Eastern DPS,<br>California to Southeast Alaska)                                                          | 90-13 | ↑ | + 5.79  | + 133.2    | 19,103 | 59,968 |
| Steller sea lion (Western DPS, Alaska )                                                                                    | 90-03 | ↓ | - 3.04  | - 39.4     | 64,761 | 39,963 |
|                                                                                                                            | 03-15 | ↑ | + 2.34  | + 28.1     | 39,963 | 52,009 |
| <b>Sirenia</b>                                                                                                             |       |   |         |            |        |        |
| Florida manatee (Florida)                                                                                                  | 74-17 | ↑ | + 17.14 | + 737.3    | 800    | 6,620  |
| Antillean manatee (Puerto Rico)                                                                                            | 76-13 | ↑ | + 4.75  | + 175.8    | 51     | 142    |
| <b>Sea Turtles</b>                                                                                                         |       |   |         |            |        |        |
| Green turtle (Central North Pacific DPS,<br>East Island, French Frigate Shoals, HI) <sup>1</sup>                           | 78-16 | ↑ | + 12.66 | + 480.9    | 101    | 88     |
| Green turtle (Central West Pacific DPS,<br>Guam waters) <sup>2</sup>                                                       | 78-10 | → | + 7.46  | + 238.6    | 92     | 299    |
| Green turtle (North Atlantic DPS,<br>Florida index beaches) <sup>3</sup>                                                   | 89-16 | ↑ | + 75.71 | + 2,044.2  | 464    | 2,978  |
| Green turtle (South Atlantic DPS,<br>Buck Reef NWR + Sandy Point NWR + Jack,<br>Isaac, and East End Bays, VI) <sup>3</sup> | 82-15 | ↑ | + 104.2 | + 3,439.1  | 31     | 931    |
| Hawksbill turtle (Atlantic DPS,<br>Mona Island, Puerto Rico) <sup>3</sup>                                                  | 74-15 | ↑ | + 22.64 | + 928.5    | 177    | 1,328  |
| Hawksbill turtle (Pacific DPS,<br>Island of Hawaii) <sup>1</sup>                                                           | 91-15 | ↑ | + 13.91 | + 333.9    | 4      | 25     |
| Kemp's ridley turtle (Texas) <sup>3</sup>                                                                                  | 79-17 | ↑ | + 284.2 | + 11,083.8 | 1      | 353    |
| Leatherback turtle (Atlantic DPS,<br>Florida +Puerto Rico + Sandy Point NWR, VI) <sup>3</sup>                              | 84-16 | ↑ | + 32.25 | + 1,032.2  | 368    | 3,625  |
| Loggerhead turtle (NW Atlantic DPS,<br>Peninsular FL index beaches) <sup>3</sup>                                           | 89-16 | → | + 1.16  | + 31.4     | 39,083 | 65,807 |

290 <sup>1</sup> Number of nesting females

291 <sup>2</sup> Number of individuals

292 <sup>3</sup> Number of nests

293 **Fig 2. Population trends of cetacean marine mammals listed under the ESA.** Trend lines  
294 (gray area: 95% confidence interval) are loess curves with span of 0.5 to aid in visual  
295 representation. Grey dots are estimated number of individuals. Panels are organized by  
296 decreasing length of time listed and then in alphabetical order based on species names. Dashed  
297 vertical red lines indicate the year of ESA listing. For species selection criteria see methods; for  
298 protection status see Table 1; and for results of fitting models see S2 Table. Abbreviations are  
299 CA/OR/WA: California/Oregon/Washington; E.N.: Eastern North; and W.N.: Western North.

300  
301 Non-cetacean marine mammals also significantly increased in abundance at relatively high  
302 population growth rates since ESA protection. Notably, the Guadalupe fur seal (*Arctocephalus*  
303 *townsendi*) increased about nine times at ~15% per year since listing in 1985 (Fig 3; Table 3).  
304 The California population of the Southern sea otter (*Enhydra lutris nereis*) approximately  
305 doubled in numbers and it is likely to reach the demographic recovery criteria in the coming  
306 years (Fig 3; Table 3). The Eastern DPS of Steller sea lion (*Eumetopias jubatus*) tripled its  
307 population at ~6% per year since 1990, reaching its recovery criteria of ~60,000 individuals in  
308 2013, and was subsequently delisted from the ESA (Fig 3; Table 3). Also, both the Florida and  
309 Antillean manatee subspecies increased approximately eight and three times (~17% and ~5% per  
310 year), respectively, for the past 40 years (Fig 3; Table 3); and the USFWS downlisted them from  
311 endangered to threatened in 2017 (Table 1).

312  
313 **Fig 3. Population trends of non-cetacean marine mammals listed under the ESA.** Trend  
314 lines (gray area: 95% confidence interval) are loess curves with span of 0.5 to aid in visual  
315 representation. Grey dots are estimated number of individuals. Panels are organized by

316 decreasing length of time listed. Dashed vertical red lines indicate the year of ESA listing. For  
317 species selection criteria see methods; for protection status see Table 1; and for results of fitting  
318 models see S2 Table. Abbreviations are DPS: Distinct Population Segment; Pop.: Population;  
319 N.W. North Western; and S.W: Southwest.

320

321 Representative populations of five marine mammals analyzed in our study did not increase in  
322 abundance. Three marine mammals showed non-significant population change after listing:  
323 Western North Atlantic fin whale (*Balaenoptera physalus*), Cook Inlet beluga whale  
324 (*Delphinapterus leucas*) DPS (Fig 2; Table 3 and S2 Table), and Southwest Alaska DPS of the  
325 northern sea otter (*Enhydra lutris kenyoni*) (Fig 3; Table 3 and S2 Table). In contrast, two marine  
326 mammals significantly declined after ESA listing: the critically endangered Southern Resident  
327 killer whale (*Orcinus orca*) and the Hawaiian monk seal (*Neomonachus schauinslandi*).  
328 Southern Resident killer whales declined at  $-0.93\%$  per year since listing in 2005, when the  
329 population had 88 individuals (Fig 2, Table 3). This population suffered major declines after a  
330 record high of 98 individuals in 1995, and the last population survey estimated 76 individuals in  
331 September 2017, a 30-year low (Fig 2; Table 3). Total abundance of Hawaiian monk seals from  
332 six index subpopulations in the Northwestern Hawaiian Islands significantly declined from 1,997  
333 individuals in 1985 to 789 seals in 2013 at approximately  $-2\%$  per year (Fig 3; Table 3).  
334 However, the population has increased to 968 seals by 2016 (Table 3).

335

336 Nearly all sea turtle species analyzed in our study significantly increased after ESA listing (Fig  
337 4; Table 3 and S2 Table). Estimates of the number of individuals, nesting females, and number  
338 of nests in nesting beaches of representative populations of green, hawksbill, Kemp's ridley, and

339 Atlantic leatherback sea turtles showed that these species increased at considerably high growth  
340 rates (~13% to ~284% per year) for several decades, depending on initial estimates (Fig 4; Table  
341 3 and S2 Table). For example, the number of nesting females of green sea turtle at East Island of  
342 the French Frigate Shoals in Hawaii (Central North Pacific DPS) increased at ~13% per year  
343 from 101 individuals in 1978 to 492 nesting females in 2015 (Fig 4; Table 3). The number of  
344 nests of green sea turtles across Florida statewide beaches (North Atlantic DPS) increased at  
345 ~76% per year from 62 nests in 1979 to a record high of 37,341 nests in 2015 (Fig 4; Table 3).  
346 Due the strong recovery of green sea turtles across Florida, NMFS and the USFWS downlisted  
347 the entire North Atlantic DPS from endangered to threatened in 2016 (Table 1). Similarly, the  
348 number of nests of the hawksbill turtle population at Mona Island in Puerto Rico (Atlantic DPS)  
349 increased at over 22% per year from 177 in 1974 to a record high of 1,626 nests in 2014 (Fig 4;  
350 Table 3). Notably, the Atlantic leatherback populations have also experienced a considerable  
351 rebound, and the combined number of nests across Florida, Puerto Rico, and the Virgin Islands,  
352 significantly increased after ESA listing (Fig 4; Table 3).

353

354 **Figure 4 Population trajectories of sea turtles listed under the ESA.** Trend lines (gray area:  
355 95% confidence interval) are loess curves with span of 0.5 to aid in visual representation. Grey  
356 dots are estimated number of nests, except for the hawksbill Pacific DPS and the green turtle  
357 Central North Pacific DPS (number of nesting females), and green turtle Central West Pacific  
358 DPS (number of individuals). Panels are organized by decreasing length of time listed. Dashed  
359 vertical red lines indicate the year of ESA listing. For species selection criteria see methods; for  
360 protection status see Table 1; and for results of fitting models see S2 Table. Abbreviations are

361 DPS: Distinct Population Segment; Pop.: Population; C.N.: Central North; C.W.: Central West;  
362 and N.W: Northwest.

363

364 Among the sea turtles analyzed in this study, our models were not able to detect significant  
365 population linear trends for the Central West Pacific DPS of the green turtle (Guam waters), and  
366 the Northwest Atlantic DPS of the loggerhead turtle (*Caretta caretta*) across the Florida  
367 peninsula (Fig 4; Table 3 and S2 Table). For example, the best models for the number of nests of  
368 loggerhead turtles across index beaches of the Florida peninsula described a non-linear  
369 relationship where the number of nests substantially fluctuated since 1989, with a record high of  
370 65,807 in 2016 (Fig 4).

371

372

## 373 **DISCUSSION**

374 Most marine mammals and sea turtles listed under the ESA that met our selection criteria,  
375 significantly increased after listing indicating strong population recoveries. Our analyses confirm  
376 the hypothesis that ESA listed marine mammal and sea turtle species are more likely to be  
377 recovering the longer they stay protected under the law, regardless of whether they are listed as  
378 threatened or endangered. Previous studies support these findings for a variety of terrestrial taxa,  
379 marine birds, and anadromous fishes [16,19,23,25,39,55]. Here we discuss how these findings  
380 suggest that ESA protections and conservation measures are important for the recovery of  
381 imperiled marine mammals and sea turtles, and illustrate specific examples through three case  
382 studies.

383

384 The ESA's prohibitions on commercial exploitation paired with the implementation of  
385 widespread conservation measures such as interagency consultation, recovery plans and critical  
386 habitat designations have been crucial to mitigating threats that affect marine mammals and sea  
387 turtles [34,56]. Strong population increases for most marine mammal and sea turtle species after  
388 ESA protection demonstrate the capacity of these taxa to recover from drastic declines after  
389 decades of exploitation, habitat degradation, and other threats. Between the 18<sup>th</sup> to early 20<sup>th</sup>  
390 century these groups were substantially depleted [4,46,57,58], in a few cases to extinction such  
391 as the Steller's sea cow [59] and the Caribbean monk seal [60,61]. Marine mammals and sea  
392 turtles have greatly benefited from a major change from resource exploitation (e.g., whaling,  
393 hunting, egg harvesting) to conservation measures that protect these species from direct and  
394 indirect harm [62].

395  
396 For the large whales, ESA protections facilitated the recovery of populations that were severely  
397 depleted by commercial whaling by reducing key threats such as ship strikes, entanglement in  
398 fishing gear, and pollution [56,63–67]. For example, ESA protection led to the establishment of  
399 vessel speed limits and restrictions on approaching whales too closely to lower the likelihood of  
400 death and injury from vessel strikes [68–70]. By triggering a depleted designation under the U.S.  
401 Marine Mammal Protection Act (MMPA), ESA marine mammal listings have prompted the  
402 implementation of take reduction plans to reduce injury and death from fisheries entanglement  
403 that require gear modifications, time and area closures, and vessel observers [40,71]. ESA  
404 regulations have also helped to limit acoustic harms to whales and other marine mammals by  
405 restricting U.S. military use of sonar and explosions in biologically important habitat areas  
406 around Hawaii Islands and Southern California [72].

407  
408 For sea turtles, ESA protections have been instrumental in reducing primary threats from human  
409 harvest, fishery bycatch, and habitat destruction. The ESA's prohibitions on harvesting sea  
410 turtles and their eggs has virtually eliminated this key threat – historically the principal cause of  
411 sea turtle population declines – in U.S. turtle nesting and foraging grounds [73,74]. ESA listing  
412 prompted regulations that have reduced sea turtle bycatch mortality in commercial fisheries by  
413 requiring gear modifications (e.g., turtle excluder devices in trawl fisheries, circle hooks in  
414 longline fisheries, modifications to pound net leaders), time and area closures, bycatch limits,  
415 changes to fishing practices, and monitoring programs [75–78]. ESA-prompted reductions in off-  
416 road-vehicle use and night lighting on nesting beaches have improved nesting success [79,80], as  
417 has protection of important turtle nesting beaches as National Wildlife Refuges (NWR) on the  
418 Atlantic coast (e.g., Archie Carr NWR, Florida) and the U.S. Caribbean (e.g., Culebra NWR,  
419 Puerto Rico; Sandy Point NWR, U.S. Virgin Islands) [73,74,81]. In addition, ESA protections  
420 have facilitated federal and state agencies (e.g., National Park Service, Florida Fish and Wildlife  
421 Conservation Commission) to contribute funding and supported conservation efforts including  
422 species reintroductions, e.g., Kemp's ridley turtles in Texas [82], and volunteer monitoring and  
423 scientific data collection on most sea turtle nesting beaches across the U.S. (e.g., Florida  
424 Statewide and Index Nesting Beach Survey program).

425  
426 Two marine mammal species with populations that did not significantly change were listed  
427 relatively recently (< 15 years). For example, the Cook Inlet DPS of beluga whale in Alaska was  
428 listed in 2008 and the Southwest Alaska DPS of the northern sea otter was listed in 2005.  
429 Conservation measures for these two species were developed relatively recently and ongoing

430 threats have not been mitigated [83,84]. It is likely that these species will require more time  
431 under ESA protection as well as the adoption of robust conservation measures. In contrast, one  
432 marine mammal and two sea turtles listed for several decades had populations with non-  
433 significant change. The lack of significant population changes in the Western North Atlantic  
434 Stock of fin whale and the Central West Pacific DPS of green turtle may be related to lack of  
435 statistical power to detect a trend in abundance as confidence intervals of population estimates  
436 were relatively large (Figs. 2 and 4; S1 Table) [74,85]. Alternatively, the populations of these  
437 species may be stable, but further population estimates are needed to determine stability [74,85].  
438 Finally, fluctuations in the number of nests of the Northwest Atlantic DPS of loggerhead turtle  
439 across Florida beaches have been strongly correlated with ocean conditions associated with long  
440 term climate forcing such as the Atlantic Multidecadal Oscillation [86].

441  
442 Endangered marine mammal species with relatively low population abundance that significantly  
443 declined after listing (e.g., Southern Resident killer whale and Hawaiian monk seal) or showed  
444 non-significant change (e.g., Cook Inlet beluga whale) require urgent conservation attention.  
445 NMFS already recognizes these species among those most at-risk of extinction in the immediate  
446 future and they are considered recovery priorities because of rapid population declines [87].  
447 These species face several similar regional anthropogenic threats including prey reduction due to  
448 fishing, habitat degradation, toxic pollutants, disturbance from boat traffic and marine noise,  
449 fishery interactions, as well as global threats associated with climate change and ocean regime  
450 shifts that affect food availability [88–92]. In particular, food limitation has been recognized as a  
451 key driver of lower body condition, pregnancy failures, calf/pup and juvenile mortality, and lack  
452 of population recovery [92–96]. Numerous conservation measures addressing anthropogenic



453 stressors have been developed for these species and are delineated in recovery plans [84,97,98].  
454 For example, NMFS established regulations to protect killer whales in Washington waters from  
455 vessel impacts in 2011 (76 FR 20870). For Hawaiian monk seals, entanglements in fishing gear,  
456 fishery interactions, and other human-caused mortalities (e.g., intentional killing) have been  
457 reduced since ESA listing, especially across the inhabited Main Hawaiian Islands [98,99]. In  
458 fact, after more than 50 years of continued decline, the range-wide population seems to have  
459 steadily increased in numbers since 2013 to approximately 1,400 seals in 2016 [100]. Recently,  
460 stronger conservation measures have been developed in high-priority action plans that focus  
461 efforts and resources to reduce threats and stabilize population declines [87]. The outcomes of  
462 these conservation efforts will require time to be realized, although the compounding effects of  
463 climate change stressors may compromise the ability of these endangered species to rebound.

464

#### 465 ***Case studies illustrate the recovery benefits of ESA listing***

##### 466 *Hawaii DPS of humpback whale*

467 The Hawaii DPS of humpback whale was delisted by NMFS in 2016 based on its strong  
468 population growth and the mitigation of key threats (NMFS 2015). Whales in this population use  
469 the waters surrounding the main Hawaiian Islands for mating and calving and migrate to feeding  
470 in areas off Southeast Alaska and northern British Columbia. The size of the population in  
471 Hawaiian waters increased from 800 individuals in 1979 to more than 10,000 individuals in  
472 2005, with the recent population growth rate estimated around 6% (NMFS 2015). ESA listing in  
473 1970 prompted conservation measures in Hawaii and Alaska to reduce key threats to recovery.  
474 ESA regulations restricted vessels in Hawaiian and Alaskan waters from approaching whales  
475 within 100 yards, prohibited disrupting normal behaviors, and required slower vessel speeds to  
476 reduce the likelihood of ship strikes and minimize human disturbance (60 FR 3775, 66 FR

477 29502). ESA listing also prompted coordinated federal and state efforts to reduce whale  
478 entanglements in fishing gear through the Hawaiian Islands Disentanglement Network and  
479 Alaska Response Network. The threatened status of humpback whales also provided impetus for  
480 the designation of the 1,400 square-mile Hawaiian Islands Humpback Whale National Marine  
481 Sanctuary in 1992 to protect humpback whales and their habitat (60 FR 48000).

482

483

#### 484 *Western DPSs of Steller sea lion*

485 Population abundance of the Western DPS of Steller sea lion, which ranges from Eastern Gulf of  
486 Alaska to the Western Aleutian Islands and Bering Sea [101], significantly increased over the  
487 past 13 years (Fig 3). This species has shown a tremendous population recovery despite years of  
488 overexploitation (for their fur, meat, and oil), indiscriminate killing, and decades of habitat  
489 degradation, ship strikes, and fishery interactions [102]. Subpopulations of the Western DPS  
490 suffered major declines through 2003 when a substantial population rebound began to occur  
491 [101]. Abundance estimates of the Western DPS declined from 140,000 to 110,000 individuals  
492 between 1960 and 1979 in rookeries and haul-outs across Southwest Alaska [102]. Total counts  
493 continued to decline at 15% per year in the late 1980s, prompting NMFS to list the Western DPS  
494 as threatened throughout the entire range in 1990 (NMFS 2008) and to uplist it to endangered in  
495 1997 because of continued declines during the 1990s [103]. Population abundance stabilized in  
496 the early 2000s [104,105] with the lowest population estimate in 2003 [101]. Notably, population  
497 abundance significantly increased at 2.34% per year from 2003 to 2015 (Fig 5).

498

499 Conservation efforts under both the ESA and the MMPA such as designation of protective zones,  
500 critical habitat designation, fishery regulations for prey species, and local regulations around

501 major rookeries and haul-outs have likely contributed to the species recovery success [102].  
502 NMFS implemented several fishery management measures (e.g., area closures, catch and harvest  
503 limits, reduction of disturbance due to fishing) in the Alaska groundfish fisheries in 2003 (Bering  
504 Sea and Gulf of Alaska) around major haul-outs and rookeries within the designated critical  
505 habitat (68 FR 204). These regulations, designed to reduce competition for prey between  
506 commercial fishing and Steller sea lions and increase prey availability, are thought to have  
507 contributed to increased prey abundance and a rebound of the DPS [102,106]. In fact, counts  
508 have increased at an average of 2.17% (juveniles and adults) and 1.76% (pups) per year from  
509 2000 to 2015 [101,107], although geographical variation exists due to migration among  
510 subpopulations (NMFS 2015).

511

#### 512 *North Atlantic DPS of green sea turtle*

513 The North Atlantic DPS of the green sea turtle, which mostly nests across Florida beaches, is  
514 another ESA conservation success. The species has been increasing exponentially and has  
515 become one of the largest nesting aggregations in the western Atlantic in recent years [74].  
516 Historically exploited across the Caribbean [46], this species has shown a high recovery potential  
517 when nesting areas are strictly protected from human disturbance and development, and fishery  
518 bycatch is substantially reduced [74]. The North Atlantic DPS of green turtles showed high  
519 records of nest numbers in 2013 (36,169 nests) and 2015 (37,341 nests) across Florida nesting  
520 beaches compared with only 62 nests estimated in 1979 (Fig 4). In 2016, NMFS and USFWS  
521 reclassified green sea turtles into 11 DPSs of which the Florida population was downlisted from  
522 endangered to threatened due to strong population growth and record numbers in nesting beaches  
523 throughout the peninsula (81 FR 20057).

524  
525 ESA tools have been crucial for the recovery of the North Atlantic DPS of green sea turtles. ESA  
526 regulations have led to fishing gear modifications, major changes in fishing practices, time and  
527 area closures, and the establishment of turtle excluder devices for shrimp trawlers [77,108]. In  
528 particular, fishery regulations instituted because of ESA protection have been largely successful  
529 in reducing green sea turtle bycatch from Atlantic pelagic longlines and gillnets, the Chesapeake  
530 Bay pound net fishery, and the Gulf of Mexico's shrimp and flounder trawl fisheries [74]. Take  
531 prohibitions (i.e., no killing of adults or egg harvesting) under the ESA have been a major  
532 conservation tool that directly boosts population growth. In addition, several national wildlife  
533 refuges were dedicated to protecting nesting areas on the Atlantic coast and Gulf of Mexico, with  
534 nest watchers and patrolling during nesting seasons [74]. The Florida Statewide Nesting Beach  
535 Survey program, initiated in 1979 (one year after listing) as a cooperative agreement between the  
536 USFWS and the Florida Fish and Wildlife Conservation Commission, now monitors ~215  
537 nesting beaches (~825 miles) across Florida, involving federal, state, and regional institutions as  
538 well as several conservation organizations, university scientists, and private citizens [109].  
539 Federal agencies (NMFS and USFWS) along with state agencies and other institutions have  
540 worked together in implementing the management actions in the 1991 recovery plan, eliminating  
541 or reducing threats in nesting and foraging areas [74].

542

## 543 **CONCLUSIONS**

544 Recovery is occurring for most marine mammals and sea turtles listed under the ESA and  
545 analyzed in our study. Species listed for over 20 years were more likely to have populations that  
546 significantly increased in numbers. In contrast, relatively recently listed species were more likely

547 to have populations with non-significant change or declining. Targeted conservation efforts  
548 triggered by ESA listing have been largely successful in promoting species recovery leading to  
549 the delisting of some species and to dramatic increases in most. The recovery of listed species  
550 depends ultimately on the adequate implementation of the ESA's tools and conservation  
551 measures. Studies have demonstrated that the government's failure to fully implement the ESA's  
552 protections and adequately fund conservation actions have been major impediments to species  
553 recovery [19]. In general, listed species with designated critical habitat, sufficient conservation  
554 funding, and well-implemented species-specific recovery plans tend to recover relatively faster  
555 [16,23,24]. Our analysis not only underscores the capacity of marine mammals and sea turtles to  
556 rebound after decades of exploitation and habitat degradation, but also highlights the success of  
557 marine species conservation through the ESA protection.

558

559 **ACKNOWLEDGMENTS**

560 Several staff from the Center for Biological Diversity gathered and organized the data used in  
561 this paper. Thanks to the thorough review by Miyoko Sakashita that substantially improved this  
562 paper.

563

564 **REFERENCES**

565

- 566 1. McCauley DJ, Pinsky ML, Palumbi SR, Estes JA, Joyce FH, Warner RR. Marine  
567 defaunation: Animal loss in the global ocean. *Science*. 2015;347: 1255641.  
568 doi:10.1126/science.1255641
- 569 2. Halpern BS, Frazier M, Potapenko J, Casey KS, Koenig K, Longo C, et al. Spatial and  
570 temporal changes in cumulative human impacts on the world's ocean. *Nat Commun*.  
571 2015;6: 7615. doi:10.1038/ncomms8615
- 572 3. Pauly D, Watson R, Alder J. Global trends in world fisheries: impacts on marine  
573 ecosystems and food security. *Philos Trans R Soc B Biol Sci*. 2005;360: 5–12.
- 574 4. Lotze HK, Lenihan HS, Bourque BJ, Bradbury RH, Cooke RG, Kay MC, et al. Depletion,  
575 Degradation, and Recovery Potential of Estuaries and Coastal Seas. *Science*. 2006;312:  
576 1806–1809.
- 577 5. Islam MS, Tanaka M. Impacts of pollution on coastal and marine ecosystems including  
578 coastal and marine fisheries and approach for management: a review and synthesis. *Mar*  
579 *Pollut Bull*. 2004;48: 624–649.
- 580 6. Hoegh-Guldberg O, Bruno JF. The impact of climate change on the world's marine  
581 ecosystems. *Science*. 2010;328: 1523–1528. doi:10.1126/science.1189930
- 582 7. Poloczanska ES, Brown CJ, Sydeman WJ, Kiessling W, Schoeman DS, Moore PJ, et al.  
583 Global imprint of climate change on marine life. *Nat Clim Change*. 2013;3: 919–925.
- 584 8. Short FT, Polidoro B, Livingstone SR, Carpenter KE, Bandeira S, Bujang JS, et al.  
585 Extinction risk assessment of the world's seagrass species. *Biol Conserv*. 2011;144: 1961–  
586 1971.
- 587 9. Polidoro BA, Carpenter KE, Collins L, Duke NC, Ellison AM, Ellison JC, et al. The loss  
588 of species: mangrove extinction risk and geographic areas of global concern. *PloS One*.  
589 2010;5: e10095.

- 590 10. Carpenter KE, Abrar M, Aeby G, Aronson RB, Banks S, Bruckner A, et al. One-third of  
591 reef-building corals face elevated extinction risk from climate change and local impacts.  
592 *Science*. 2008;321: 560–563. doi:10.1126/science.1159196
- 593 11. Dulvy NK, Fowler SL, Musick JA, Cavanagh RD, Kyne PM, Harrison LR, et al.  
594 Extinction risk and conservation of the world’s sharks and rays. *eLife*. 2014;3: e00590.  
595 doi:10.7554/eLife.00590
- 596 12. Collette BB, Carpenter KE, Polidoro BA, Juan-Jordá MJ, Boustany A, Die DJ, et al. High  
597 value and long life—double jeopardy for tunas and billfishes. *Science*. 2011;333: 291–  
598 292.
- 599 13. Webb TJ, Mindel BL. Global patterns of extinction risk in marine and non-marine  
600 systems. *Curr Biol*. 2015;25: 506–511.
- 601 14. Rohlf DJ. *The Endangered Species Act: A guide to its protections and implementation*.  
602 Stanford, California: Stanford Environmental Law Society; 1989.
- 603 15. Wolf S, Hartl B, Carroll C, Neel MC, Greenwald DN. Beyond PVA: Why Recovery under  
604 the Endangered Species Act Is More than Population Viability. *BioScience*. 2015;65: 200–  
605 207. doi:10.1093/biosci/biu218
- 606 16. Luther D, Skelton J, Fernandez C, Walters J. Conservation action implementation,  
607 funding, and population trends of birds listed on the Endangered Species Act. *Biol*  
608 *Conserv*. 2016;197: 229–234.
- 609 17. McCarthy DP, Donald PF, Scharlemann JPW, Buchanan GM, Balmford A, Green JMH, et  
610 al. Financial Costs of Meeting Global Biodiversity Conservation Targets: Current  
611 Spending and Unmet Needs. *Science*. 2012;338: 946–949. doi:10.1126/science.1229803
- 612 18. Malcom JW, Li Y-W. Data contradict common perceptions about a controversial  
613 provision of the US Endangered Species Act. *Proc Natl Acad Sci*. 2015;112: 15844–  
614 15849. doi:10.1073/pnas.1516938112
- 615 19. Schwartz MW. The Performance of the Endangered Species Act. *Annu Rev Ecol Evol*  
616 *Syst*. 2008;39: 279–299. doi:10.1146/annurev.ecolsys.39.110707.173538
- 617 20. ECOS. Summary of listed species listed populations and recovery plans. In: U.S. Fish and  
618 Wildlife Service, ECOS Environmental Conservation Online System [Internet]. 2017  
619 [cited 30 Apr 2017]. Available: <https://ecos.fws.gov/ecp0/reports/delisting-report>
- 620 21. Scott JM, Goble DD, Davis FW. *The Endangered Species Act at Thirty: Vol. 2:*  
621 *Conserving Biodiversity in Human-Dominated Landscapes* [Internet]. Washington, DC:  
622 Island press; 2006. Available:  
623 <https://books.google.com/books?hl=en&lr=&id=luJtr72vqi0C&oi=fnd&pg=PR1&dq=Scott+By+the+numbers.+the+Endangered+Species+Act+at+Thirty:+Renewing+the+Conservation+Commitment&ots=DKH6EYczzs&sig=u-64kNT2DgIUKShIUnYJIN6kI1g>  
624  
625

- 626 22. Male TD, Bean MJ. Measuring progress in US endangered species conservation. *Ecol*  
627 *Lett.* 2005;8: 986–992.
- 628 23. Taylor MFJ, Suckling KF, Rachlinski JJ. The effectiveness of the Endangered Species  
629 Act: A quantitative analysis. *BioScience.* 2005;55: 360–367.
- 630 24. Gibbs KE, Currie DJ. Protecting endangered species: do the main legislative tools work?  
631 *PLoS One.* 2012;7: e35730.
- 632 25. Suckling K, Mehrhoff LA, Beam R, Hartl B. A wild success: A systematic review of bird  
633 recovery under the Endangered Species Act. Tucson, Arizona: Center for Biological  
634 Diversity; 2016 pp. 1–20.
- 635 26. Miller JK, Scott JM, Miller CR, Waits LP. The endangered species act: Dollars and sense?  
636 *BioScience.* 2002;52: 163–168.
- 637 27. Ferraro PJ, McIntosh C, Ospina M. The effectiveness of the US endangered species act:  
638 An econometric analysis using matching methods. *J Environ Econ Manag.* 2007;54: 245–  
639 261.
- 640 28. Boersma PD, Kareiva P, Fagan WF, Alan Clark J, Hoekstra JM. How Good Are  
641 Endangered Species Recovery Plans? The effectiveness of recovery plans for endangered  
642 species can be improved through incorporation of dynamic, explicit science in the  
643 recovery process, such as strongly linking species’ biology to recovery criteria. *AIBS*  
644 *Bull.* 2001;51: 643–649.
- 645 29. Gerber LR, Hatch LT. Are we recovering? An evaluation of recovery criteria under the US  
646 Endangered Species Act. *Ecol Appl.* 2002;12: 668–673.
- 647 30. Kerkvliet J, Langpap C. Learning from endangered and threatened species recovery  
648 programs: A case study using US Endangered Species Act recovery scores. *Ecol Econ.*  
649 2007;63: 499–510.
- 650 31. NOAA Fisheries. Endangered and threatened marine species [Internet]. 2018 [cited 24  
651 Mar 2018]. Available: <http://www.nmfs.noaa.gov/pr/species/esa/>
- 652 32. Scott JM, Goble DD, Wiens JA, Wilcove DS, Bean M, Male T. Recovery of imperiled  
653 species under the Endangered Species Act: the need for a new approach. *Front Ecol*  
654 *Environ.* 2005;3: 383–389. doi:10.1890/1540-9295(2005)003[0383:ROISUT]2.0.CO;2
- 655 33. Neel MC, Leidner AK, Haines A, Goble DD, Scott JM. By the Numbers: How is  
656 Recovery Defined by the US Endangered Species Act? *BioScience.* 2012;62: 646–657.  
657 doi:10.1525/bio.2012.62.7.7
- 658 34. Evans DM, Che-Castaldo JP, Crouse D, Davis FW, Epanchin-Niell R, Flather CH, et al.  
659 Species recovery in the United States: Increasing the effectiveness of the Endangered  
660 Species Act. *Issues Ecol.* 2016;2016: 1–28.



- 661 35. Good TP, Beechie TJ, McElhany P, McClure MM, Ruckelshaus MH. Recovery planning  
662 for Endangered Species Act-listed Pacific salmon: using science to inform goals and  
663 strategies. *Fisheries*. 2007;32: 426–440.
- 664 36. Williams TH, Spence BC, Boughton DA, Johnson RC, Crozier L, Mantua N, et al.  
665 Viability assessment for Pacific salmon and steelhead listed under the Endangered Species  
666 Act: Southwest [Internet]. U.S. Department of Commerce, National Oceanic and  
667 Atmospheric Administration National Marine Fisheries Service Southwest Fisheries  
668 Science Center; 2016 pp. 1–152. Report No.: NOAA-TM-NMFS-SWFSC-564. Available:  
669 <http://www.barnett-johnson.com/uploads/1/9/9/0/1990941/noaa-tm-nmfs-swfsc-564.pdf>
- 670 37. Walls SC, Ball LC, Barichivich WJ, Dodd CK, Enge KM, Gorman TA, et al. Overcoming  
671 challenges to the recovery of declining amphibian populations in the United States.  
672 *BioScience*. 2017;67: 156–165. doi:10.1093/biosci/biw153
- 673 38. Elphick CS, Reed JM, Bonta JM. Correlates of population recovery goals in endangered  
674 birds. *Conserv Biol*. 2001;15: 1285–1291.
- 675 39. Leonard Jr. DL. Recovery expenditures for birds listed under the US Endangered Species  
676 Act: The disparity between mainland and Hawaiian taxa. *Biol Conserv*. 2008;141: 2054–  
677 2061. doi:10.1016/j.biocon.2008.06.001
- 678 40. Roman J, Altman I, Dunphy-Daly MM, Campbell C, Jasny M, Read AJ. The Marine  
679 Mammal Protection Act at 40: status, recovery, and future of U.S. marine mammals: The  
680 Marine Mammal Protection Act at 40. *Ann N Y Acad Sci*. 2013;1286: 29–49.  
681 doi:10.1111/nyas.12040
- 682 41. Mazaris AD, Schofield G, Gkazinou C, Almpantidou V, Hays GC. Global sea turtle  
683 conservation successes. *Sci Adv*. 2017;3: e1600730. doi:10.1126/sciadv.1600730
- 684 42. Foley CM, Lynch MA, Thorne LH, Lynch HJ. Listing Foreign Species under the  
685 Endangered Species Act: A Primer for Conservation Biologists. *Bioscience*. 2017;67:  
686 627–637.
- 687 43. Magera AM, Flemming JEM, Kaschner K, Christensen LB, Lotze HK. Recovery Trends  
688 in Marine Mammal Populations. *PLOS ONE*. 2013;8: e77908.  
689 doi:10.1371/journal.pone.0077908
- 690 44. National Research Council, Committee on the Review of Sea-Turtle Population  
691 Assessment Methods, National Academy of Sciences (U.S.), United States, National  
692 Oceanic and Atmospheric Administration. *Assessment of Sea-Turtle Status and Trends:  
693 Integrating Demography and Abundance* [Internet]. Washington, D.C.: National  
694 Academies Press; 2010. Available:  
695 <http://public.eblib.com/choice/publicfullrecord.aspx?p=3378665>
- 696 45. Balazs GH, Chaloupka M. Thirty-year recovery trend in the once depleted Hawaiian green  
697 sea turtle stock. *Biol Conserv*. 2004;117: 491–498.

- 698 46. McClenachan L, Jackson JBC, Newman MJH. Conservation Implications of Historic Sea  
699 Turtle Nesting Beach Loss. *Front Ecol Environ*. 2006;4: 290–296.
- 700 47. Anderson DR. *Model based inference in the life sciences: a primer on evidence*. 1st ed.  
701 New York; London: Springer-Verlag New York; 2008.
- 702 48. Zuur A, Ieno EN, Walker N, Saveliev AA, Smith GM. *Mixed effects models and  
703 extensions in ecology with R*. Springer; 2009.
- 704 49. Burnham KP, Anderson DR. *Model selection and multi-model inference: a practical  
705 information-theoretic approach*. 2nd ed. Springer New York; 2002.
- 706 50. R Core Team. *R: A Language and Environment for Statistical Computing*, R Foundation  
707 for Statistical Computing, Vienna, Austria. Vienna, Austria. [Internet]. 2016 [cited 7 Jul  
708 2016]. Available: <http://www.R-project.org>
- 709 51. Pinheiro J, Bates D, DebRoy S, Sarkar D, R Core Team. *Linear and Nonlinear Mixed  
710 Effects Models\_*. R package version 3.1-131 [Internet]. 2017. Available: [https://CRAN.R-  
711 project.org/package=nlme](https://CRAN.R-project.org/package=nlme)
- 712 52. Hastie T. *gam: Generalized Additive Models* [Internet]. 2017. Available: [https://CRAN.R-  
713 project.org/package=gam](https://CRAN.R-project.org/package=gam)
- 714 53. Barton K. *MuMIn: Multi-model inference*. R package version 1.15.6. [http://CRAN.R-  
715 project.org/package=MuumIn](http://CRAN.R-project.org/package=MuumIn). 2016; Available: [http://CRAN.R-  
716 project.org/package=MuumIn](http://CRAN.R-project.org/package=MuumIn)
- 717 54. Wickham H. *ggplot2: Elegant Graphics for Data Analysis* [Internet]. Springer-Verlag New  
718 York; 2009. Available: <http://ggplot2.org>
- 719 55. Carroll C, Vucetich JA, Nelson MP, Rohlf DJ, Phillips MK. Geography and Recovery  
720 under the U.S. Endangered Species Act. *Conserv Biol*. 2010;24: 395–403.  
721 doi:10.1111/j.1523-1739.2009.01435.x
- 722 56. Perry SL, DeMASTER DP, Silber GK. The great whales: History and status of six species  
723 listed as endangered under the US Endangered Species Act of 1973. *Mar Fish Rev*.  
724 1999;61: 1–74.
- 725 57. Baker CS, Clapham PJ. Modelling the past and future of whales and whaling. *Trends Ecol  
726 Evol*. 2004;19: 365–371. doi:10.1016/j.tree.2004.05.005
- 727 58. Morais IOB, Danilewicz D, Zerbini AN, Edmundson W, Hart IB, Bortolotto GA. From  
728 the southern right whale hunting decline to the humpback whaling expansion: A review of  
729 whale catch records in the tropical western South Atlantic Ocean. *Mammal Rev*. 2017;47:  
730 11–23.
- 731 59. Estes JA, Burdin A, Doak DF. Sea otters, kelp forests, and the extinction of Steller’s sea  
732 cow. *Proc Natl Acad Sci*. 2016;113: 880–885. doi:10.1073/pnas.1502552112

- 733 60. Rice DW. Caribbean monk seal (*Monachus tropicalis*). Seals: Proceedings of a working  
734 meeting of seal specialists on threatened and depleted seals of the world, held under the  
735 auspices of the Survival Service Commission of the IUCN, IUCN Supplementary Paper.  
736 1973. pp. 98–112.
- 737 61. McClenachan L, Cooper AB. Extinction rate, historical population structure and  
738 ecological role of the Caribbean monk seal. *Proc R Soc Lond B Biol Sci.* 2008;275: 1351–  
739 1358.
- 740 62. Lotze HK, Worm B. Historical baselines for large marine animals. *Trends Ecol Evol.*  
741 2009;24: 254–262. doi:10.1016/j.tree.2008.12.004
- 742 63. Johnson A, Salvador G, Kenney J, Robbins J, Kraus S, Landry S, et al. Fishing gear  
743 involved in entanglements of right and humpback whales. *Mar Mammal Sci.* 2005;21:  
744 635–645.
- 745 64. Moore E, Lyday S, Roletto J, Litle K, Parrish JK, Nevins H, et al. Entanglements of  
746 marine mammals and seabirds in central California and the north-west coast of the United  
747 States 2001–2005. *Mar Pollut Bull.* 2009;58: 1045–1051.  
748 doi:10.1016/j.marpolbul.2009.02.006
- 749 65. Bettridge SOM, Baker SC, Barlow J, Clapham P, Ford MJ, Gouveia D, et al. Status review  
750 of the humpback whale (*Megaptera novaeangliae*) under the Endangered Species Act  
751 [Internet]. US Department of Commerce, National Oceanic and Atmospheric  
752 Administration, National Marine Fisheries Service,[Southwest Fisheries Science Center];  
753 2015 p. 263. Report No.: NOAA-TM-NMFS-SWFSC-540. Available:  
754 [https://alaskafisheries.noaa.gov/sites/default/files/humpback\\_whale\\_sr\\_2015.pdf](https://alaskafisheries.noaa.gov/sites/default/files/humpback_whale_sr_2015.pdf)
- 755 66. van der Hoop JM, Vanderlaan ASM, Cole TVN, Henry AG, Hall L, Mase-Guthrie B, et al.  
756 Vessel strikes to large whales before and after the 2008 ship strike rule. *Conserv Lett.*  
757 2015;8: 24–32. doi:10.1111/conl.12105
- 758 67. Pace RM, Corkeron PJ, Kraus SD. State-space mark-recapture estimates reveal a recent  
759 decline in abundance of North Atlantic right whales. *Ecol Evol.* 2017;  
760 doi:10.1002/ece3.3406
- 761 68. Laist DW, Shaw C. Preliminary evidence that boat speed restrictions reduce deaths of  
762 Florida manatees. *Mar Mammal Sci.* 2006;22: 472.
- 763 69. Wiley DN, Moller JC, Pace RM, Carlson C. Effectiveness of voluntary conservation  
764 agreements: case study of endangered whales and commercial whale watching. *Conserv*  
765 *Biol.* 2008;22: 450–457.
- 766 70. Conn PB, Silber GK. Vessel speed restrictions reduce risk of collision-related mortality  
767 for North Atlantic right whales. *Ecosphere.* 2013;4: art43. doi:10.1890/ES13-00004.1

- 768 71. Lewison RL, Crowder LB, Read AJ, Freeman SA. Understanding impacts of fisheries  
769 bycatch on marine megafauna. *Trends Ecol Evol.* 2004;19: 598–604.  
770 doi:10.1016/j.tree.2004.09.004
- 771 72. Zirbel K, Balint P, Parsons ECM. Navy sonar, cetaceans and the US Supreme Court: A  
772 review of cetacean mitigation and litigation in the US. *Mar Pollut Bull.* 2011;63: 40–48.  
773 doi:10.1016/j.marpolbul.2011.03.018
- 774 73. Conant TA, Dutton PH, Eguchi T, Epperly SP, Fahy CC, Godfrey MH, et al. Loggerhead  
775 sea turtle (*Caretta caretta*) 2009 status review under the US Endangered Species Act. Rep  
776 Loggerhead Biol Rev Team Natl Mar Fish Serv. 2009;222: 5–2.
- 777 74. Seminoff JA, Allen CD, Balazs GH, Dutton PH, Eguchi T, Haas H, et al. Status review of  
778 the green turtle (*Chelonia mydas*) under the Endangered Species Act [Internet]. US  
779 Department of Commerce NOAA; 2015 p. 571. Report No.: NOAA-TM-NMFS-SWFSC-  
780 539. Available:  
781 [http://www.researchgate.net/profile/Kyle\\_Van\\_Houtan/publication/262262552\\_Green\\_tur](http://www.researchgate.net/profile/Kyle_Van_Houtan/publication/262262552_Green_turtle_(Chelonia_mydas)_Status_Review_under_the_U.S._Endangered_Species_Act/links/550c55310cf275261095d890.pdf)  
782 [tle\\_\(Chelonia\\_mydas\)\\_Status\\_Review\\_under\\_the\\_U.S.\\_Endangered\\_Species\\_Act/links/5](http://www.researchgate.net/profile/Kyle_Van_Houtan/publication/262262552_Green_turtle_(Chelonia_mydas)_Status_Review_under_the_U.S._Endangered_Species_Act/links/550c55310cf275261095d890.pdf)  
783 [50c55310cf275261095d890.pdf](http://www.researchgate.net/profile/Kyle_Van_Houtan/publication/262262552_Green_turtle_(Chelonia_mydas)_Status_Review_under_the_U.S._Endangered_Species_Act/links/550c55310cf275261095d890.pdf)
- 784 75. Crowder LB, Hopkins-Murphy SR, Royle JA. Effects of turtle excluder devices (TEDs)  
785 on loggerhead sea turtle strandings with implications for conservation. *Copeia.* 1995; 773–  
786 779.
- 787 76. Lewison RL, Crowder LB, Shaver DJ. The Impact of Turtle Excluder Devices and  
788 Fisheries Closures on Loggerhead and Kemp’s Ridley Strandings in the Western Gulf of  
789 Mexico. *Conserv Biol.* 2003;17: 1089–1097. doi:10.1046/j.1523-1739.2003.02057.x
- 790 77. Jenkins LD. Reducing sea turtle bycatch in trawl nets: a history of NMFS turtle excluder  
791 device (TED) research. *Mar Fish Rev.* 2012;74: 26–44.
- 792 78. Swimmer Y, Gutierrez A, Bigelow K, Barceló C, Schroeder B, Keene K, et al. Sea Turtle  
793 Bycatch Mitigation in U.S. Longline Fisheries. *Front Mar Sci.* 2017;4.  
794 doi:10.3389/fmars.2017.00260
- 795 79. Nester LR. Effects of Off-road Vehicles on the Nesting Activity of Loggerhead Sea  
796 Turtles in North Carolina. PhD Thesis, University of Florida. 2006.
- 797 80. Salmon M. Protecting sea turtles from artificial night lighting at Florida’s oceanic beaches.  
798 Ecological consequences of artificial night lighting. C. Rich and T. Longcore. Washington  
799 DC: Island Press; 2006. pp. 141–168.
- 800 81. NMFS, USFWS. Leatherback sea turtle (*Dermochelys coriacea*) 5-year review: Summary  
801 and evaluation [Internet]. Silver Spring, Maryland and Jacksonville, Florida: National  
802 Marine Fisheries Service, Office of Protected Resources and U.S. Fish and Wildlife  
803 Service Southeast Region; 2013 p. 93. Available:  
804 [http://www.nmfs.noaa.gov/pr/listing/5yearreview\\_leatherbackturtle.pdf](http://www.nmfs.noaa.gov/pr/listing/5yearreview_leatherbackturtle.pdf)

- 805 82. Caillouet CWJ, Shaver DJ, Landry AMJ. Kemp's ridley sea turtle (*Lepidochelys kempii*)  
806 head-start and reintroduction to Padre Island National Seashore, Texas. *Herpetol Conserv*  
807 *Biol.* 2015;10: 309–377.
- 808 83. USFWS. Southwest Alaska DPS of the northern sea otter (*Enhydra lutris kenyoni*) 5-year  
809 review: Summary and evaluation [Internet]. Anchorage, Alaska; 2013 pp. 1–34. Available:  
810 [https://www.fws.gov/alaska/fisheries/mmm/seaotters/pdf/SW%205\\_year\\_review\\_sept\\_20](https://www.fws.gov/alaska/fisheries/mmm/seaotters/pdf/SW%205_year_review_sept_2013.pdf)  
811 [13.pdf](https://www.fws.gov/alaska/fisheries/mmm/seaotters/pdf/SW%205_year_review_sept_2013.pdf)
- 812 84. NMFS (National Marine Fisheries Service). Recovery plan for the Cook Inlet beluga  
813 whale [Internet]. Alaska Region, Protected Resources Division, Juneau, AK: National  
814 Marine Fisheries Service; 2017 p. 284. Available:  
815 [http://www.nmfs.noaa.gov/pr/recovery/plans/20170103\\_cibrp\\_final.pdf](http://www.nmfs.noaa.gov/pr/recovery/plans/20170103_cibrp_final.pdf)
- 816 85. Waring GT, Josephson E, Maze-Foley K, Rosel PE. US Atlantic and Gulf of Mexico  
817 marine mammal stock assessments–2014. Fin Whale (*Balaenoptera physalus*): Western  
818 North Atlantic Stock. NOAA Tech Memo NMFS NE. 2015;231: 39–45.
- 819 86. Houtan KSV, Halley JM. Long-Term Climate Forcing in Loggerhead Sea Turtle Nesting.  
820 *PLOS ONE.* 2011;6: e19043. doi:10.1371/journal.pone.0019043
- 821 87. NOAA Fisheries. Species in the spotlight: Survive to thrive [Internet]. 2016 [cited 25 Jul  
822 2017]. Available:  
823 [http://www.nmfs.noaa.gov/stories/2015/05/05\\_14\\_15species\\_in\\_the\\_spotlight.html](http://www.nmfs.noaa.gov/stories/2015/05/05_14_15species_in_the_spotlight.html)
- 824 88. Holt MM, Veirs V, Veirs S. Noise effects on the call amplitude of Southern Resident killer  
825 whales (*Orcinus orca*). *Bioacoustics.* 2008;17: 164–166.  
826 doi:10.1080/09524622.2008.9753802
- 827 89. Lusseau D, Bain DE, Williams R, Smith JC. Vessel traffic disrupts the foraging behavior  
828 of southern resident killer whales *Orcinus orca*. *Endanger Species Res.* 2009;6: 211–221.  
829 doi:<https://doi-org/10.3354/esr00154>
- 830 90. Hanson B, Ward E, Ford M, O'Neill S, Balcomb K. Factors affecting Southern Resident  
831 killer whale growth and recovery. *Salish Sea Ecosyst Conf.* 2014; Available:  
832 <http://cedar.wvu.edu/ssec/2014ssec/Day2/134>
- 833 91. O'Neill S, Ylitalo G, West J. Energy content of Pacific salmon as prey of northern and  
834 southern resident killer whales. *Endanger Species Res.* 2014;25: 265–281.  
835 doi:10.3354/esr00631
- 836 92. Matkin CO, Moore MJ, Gulland FM. Review of recent research on Southern Resident  
837 Killer Whales to detect evidence of poor body condition in the population [Internet].  
838 Woods Hole, MA: Independent Science Panel; 2017. doi:10.1575/1912/8803
- 839 93. Baker JD, Polovina JJ, Howell EA. Effect of variable oceanic productivity on the survival  
840 of an upper trophic predator, the Hawaiian monk seal *Monachus schauinslandi*. *Mar Ecol*  
841 *Prog Ser.* 2007;346: 277–283.

- 842 94. Ford JKB, Ellis GM, Olesiuk PF, Balcomb KC. Linking killer whale survival and prey  
843 abundance: food limitation in the oceans' apex predator? *Biol Lett.* 2010;6: 139–142.  
844 doi:10.1098/rsbl.2009.0468
- 845 95. Norman SA, Hobbs RC, Goertz CE, Burek-Huntington KA, Shelden KE, Smith WA, et al.  
846 Potential natural and anthropogenic impediments to the conservation and recovery of  
847 Cook Inlet beluga whales, *Delphinapterus leucas*. *Mar Fish Rev.* 2015;77: 89–105.
- 848 96. Wasser SK, Lundin JI, Ayres K, Seely E, Giles D, Balcomb K, et al. Population growth is  
849 limited by nutritional impacts on pregnancy success in endangered Southern Resident  
850 killer whales (*Orcinus orca*). *PloS One.* 2017;12: e0179824.
- 851 97. NMFS (National Marine Fisheries Service). Recovery Plan for Southern Resident Killer  
852 Whales (*Orcinus orca*). Seattle, WA: National Marine Fisheries Service; 2008 p. 251.
- 853 98. NMFS (National Marine Fisheries Service). Main Hawaiian Islands Monk Seal  
854 Management Plan. Pacific Islands Region [Internet]. Honolulu, HI: National Marine  
855 Fisheries Service, Protected Resources Division Pacific Islands Regional Office; 2016 p.  
856 72. Available:  
857 [http://www.fpir.noaa.gov/Library/PRD/Hawaiian%20monk%20seal/HMS\\_Management\\_](http://www.fpir.noaa.gov/Library/PRD/Hawaiian%20monk%20seal/HMS_Management_Plan_FNL.pdf)  
858 [Plan\\_FNL.pdf](http://www.fpir.noaa.gov/Library/PRD/Hawaiian%20monk%20seal/HMS_Management_Plan_FNL.pdf)
- 859 99. NMFS. Recovery plan for the Hawaiian monk seal (*Monachus schauinslandi*)  
860 revision original version: March 1983 [Internet]. Honolulu, HI: National Marine  
861 Fisheries Service, Protected Resources Division Pacific Islands Regional Office; 2007 p.  
862 165. Available:  
863 <https://pdfs.semanticscholar.org/27e3/a8272ffcbcd28a20ff1553d0a858f567c4d9.pdf>
- 864 100. NMFS (National Marine Fisheries Service). Monk Seal Population Size and Threats:  
865 NOAA Fisheries Pacific Islands Regional Office [Internet]. 2017 [cited 25 Jun 2017].  
866 Available: [http://www.fpir.noaa.gov/PRD/prd\\_hms\\_population\\_threats.html](http://www.fpir.noaa.gov/PRD/prd_hms_population_threats.html)
- 867 101. Fritz LW, Sweeney KM, Towell RG, Gelatt TS. Aerial and Ship-based Surveys of Steller  
868 Sea Lions (*Eumetopias jubatus*) Conducted in Alaska in June-July 2013 Through 2015,  
869 and an Update on the Status and Trend of the Western Distinct Population Segment in  
870 Alaska [Internet]. Alaska Fisheries Science Center; 2016 p. 81. Report No.: NMFS-AFSC-  
871 321. Available: [https://www.afsc.noaa.gov/Publications/AFSC-TM/NOAA-TM-AFSC-](https://www.afsc.noaa.gov/Publications/AFSC-TM/NOAA-TM-AFSC-321.pdf)  
872 [321.pdf](https://www.afsc.noaa.gov/Publications/AFSC-TM/NOAA-TM-AFSC-321.pdf)
- 873 102. Muto MM, Helker VT, Angliss RP, Allen BA, Boveng PL, Breiwick JM, et al. Alaska  
874 Marine Mammal Stock Assessments, 2016: STELLER SEA LION (*Eumetopias jubatus*):  
875 Western U.S. Stock [Internet]. 2016 pp. 1–14. Report No.: NOAA-TM-AFSC-355.  
876 Available: [http://www.nmfs.noaa.gov/pr/sars/pdf/stocks/alaska/2016/ak2016\\_ssl-](http://www.nmfs.noaa.gov/pr/sars/pdf/stocks/alaska/2016/ak2016_ssl-western.pdf)  
877 [western.pdf](http://www.nmfs.noaa.gov/pr/sars/pdf/stocks/alaska/2016/ak2016_ssl-western.pdf)
- 878 103. Sease JL, Taylor WP, Loughlin TR, Pitcher KW. Aerial and land-based surveys of Steller  
879 sea lions (*Eumetopias jubatus*) in Alaska, June and July 1999 and 2000 [Internet]. Alaska  
880 Fisheries Science Center: U.S. DEPARTMENT OF COMMERCE National Oceanic and



- 881 Atmospheric Administration; 2001 p. 52pp. Report No.: NMFS-AFSC-122. Available:  
882 <https://pdfs.semanticscholar.org/3f4a/9c7615bec2409d8d0ec4ad3b1f8e61453aef.pdf>
- 883 104. Sease JL, Gudmunson CJ. Aerial and land-based surveys of Steller sea lions (*Eumetopias*  
884 *jubatus*) from the western stock in Alaska, June and July 2001 and 2002 [Internet]. Alaska  
885 Fisheries Science Center: U.S. Department of Commerce, National Oceanic and  
886 Atmospheric Administration, National Marine Fisheries Service; 2002 pp. 1–46. Report  
887 No.: NMFS-AFSC-131. Available: [https://www.afsc.noaa.gov/Publications/AFSC-](https://www.afsc.noaa.gov/Publications/AFSC-TM/NOAA-TM-AFSC-131.pdf)  
888 [TM/NOAA-TM-AFSC-131.pdf](https://www.afsc.noaa.gov/Publications/AFSC-TM/NOAA-TM-AFSC-131.pdf)
- 889 105. Fritz L, Lynn M, Kunisch E, Sweeney K. Aerial, ship and land-based surveys of Steller  
890 sea lions (*Eumetopias jubatus*) in Alaska, June and July 2005–2007. NOAA Tech Memo  
891 NMFS-AFSC. 2008;183: 81.
- 892 106. Hui TCY, Gryba R, Gregr EJ, Trites AW. Assessment of Competition between Fisheries  
893 and Steller Sea Lions in Alaska Based on Estimated Prey Biomass, Fisheries Removals  
894 and Predator Foraging Behaviour. PLOS ONE. 2015;10: e0123786.  
895 doi:10.1371/journal.pone.0123786
- 896 107. Johnson DS, Fritz L. agTrend: A Bayesian approach for estimating trends of aggregated  
897 abundance. *Methods Ecol Evol.* 2014;5: 1110–1115.
- 898 108. Finkbeiner EM, Wallace BP, Moore JE, Lewison RL, Crowder LB, Read AJ. Cumulative  
899 estimates of sea turtle bycatch and mortality in USA fisheries between 1990 and 2007.  
900 *Biol Conserv.* 2011;144: 2719–2727.
- 901 109. FWC. Sea Turtle Monitoring (the SNBS and INBS Programs) [Internet]. 2017 [cited 14  
902 Dec 2017]. Available: <http://myfwc.com/research/wildlife/sea-turtles/nesting/monitoring/>
- 903

904 **Fig 1**

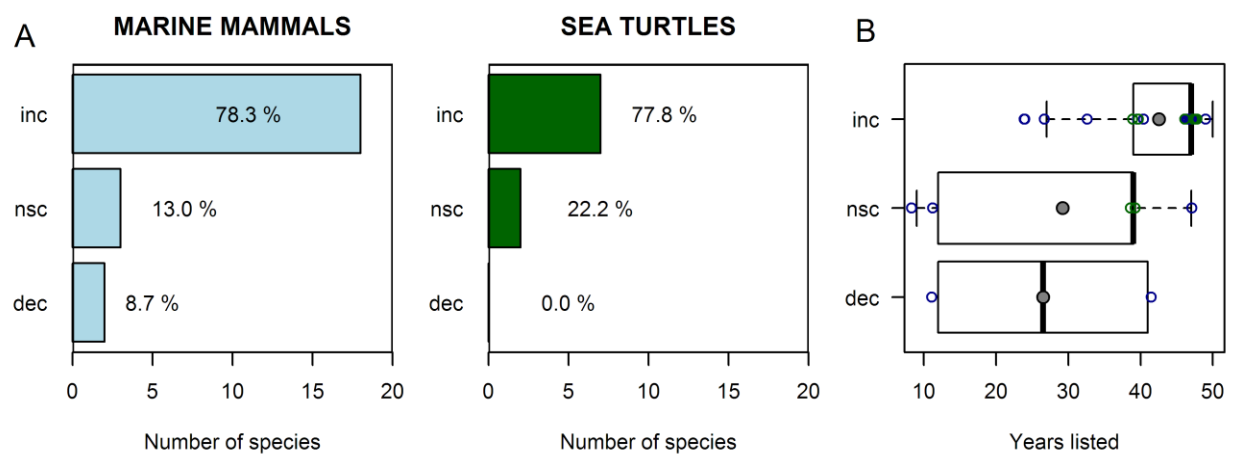

905

906



907 **Fig 2**

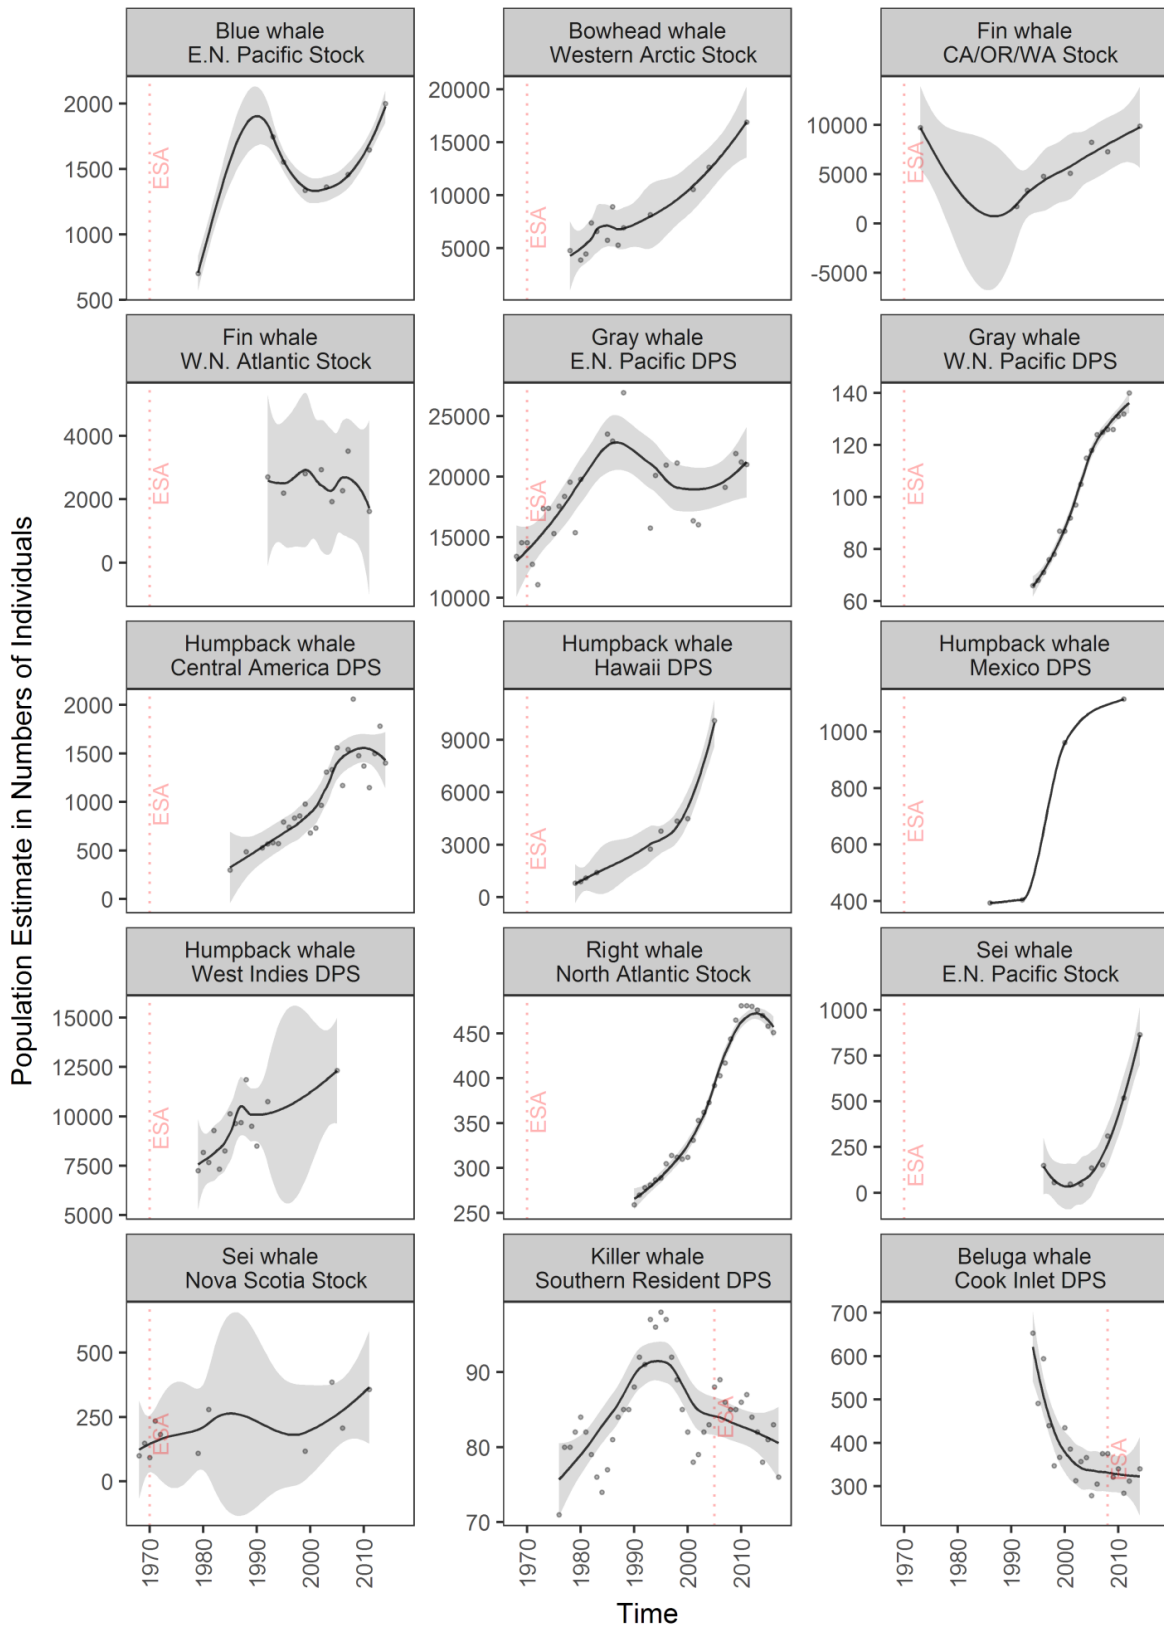

908

909 **Fig 3**

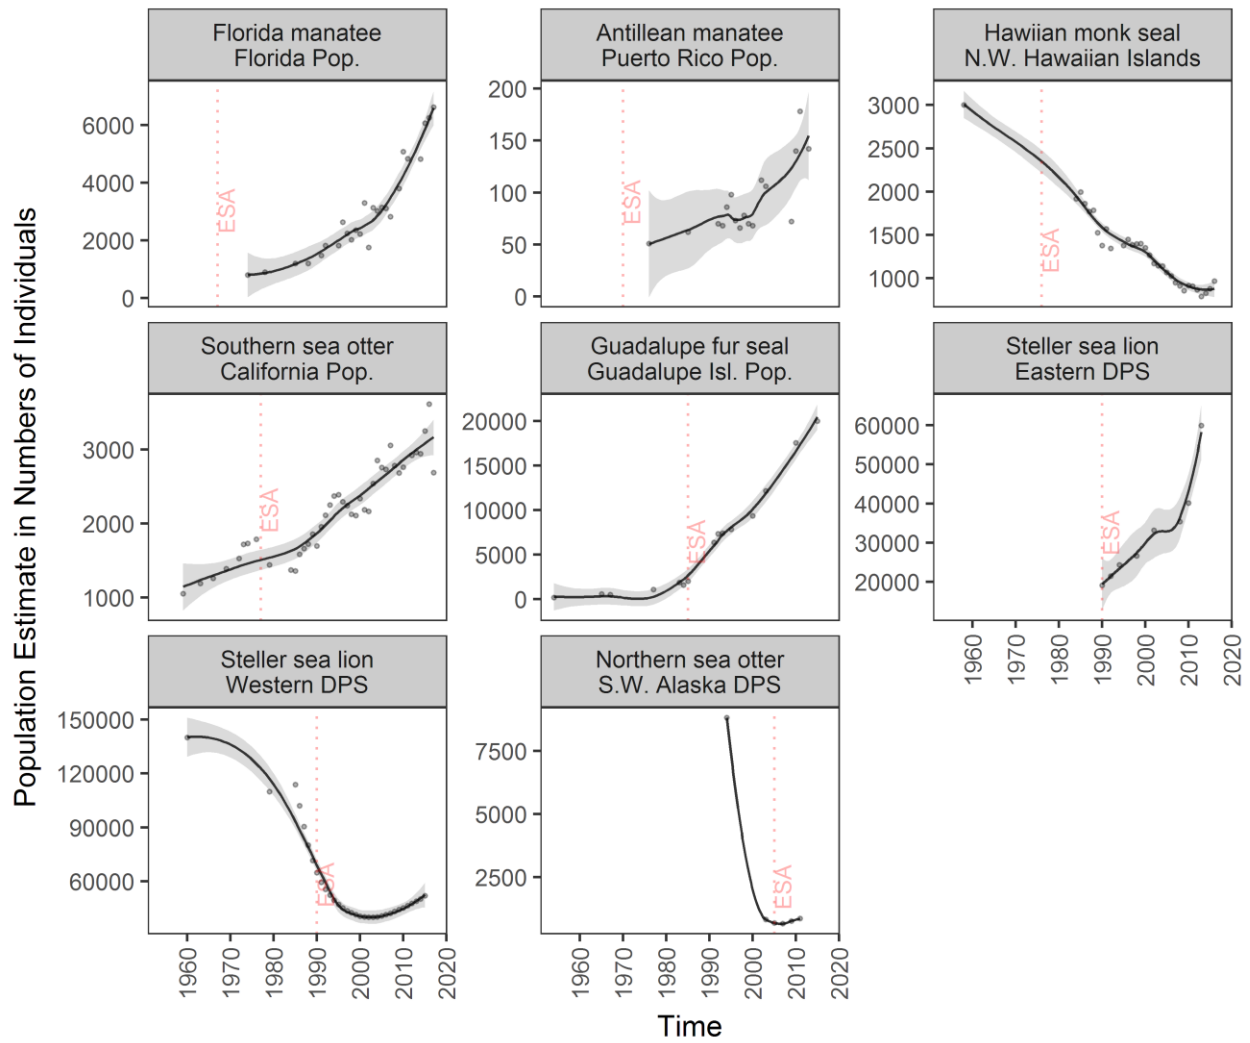

910

911

912 **Fig 4**

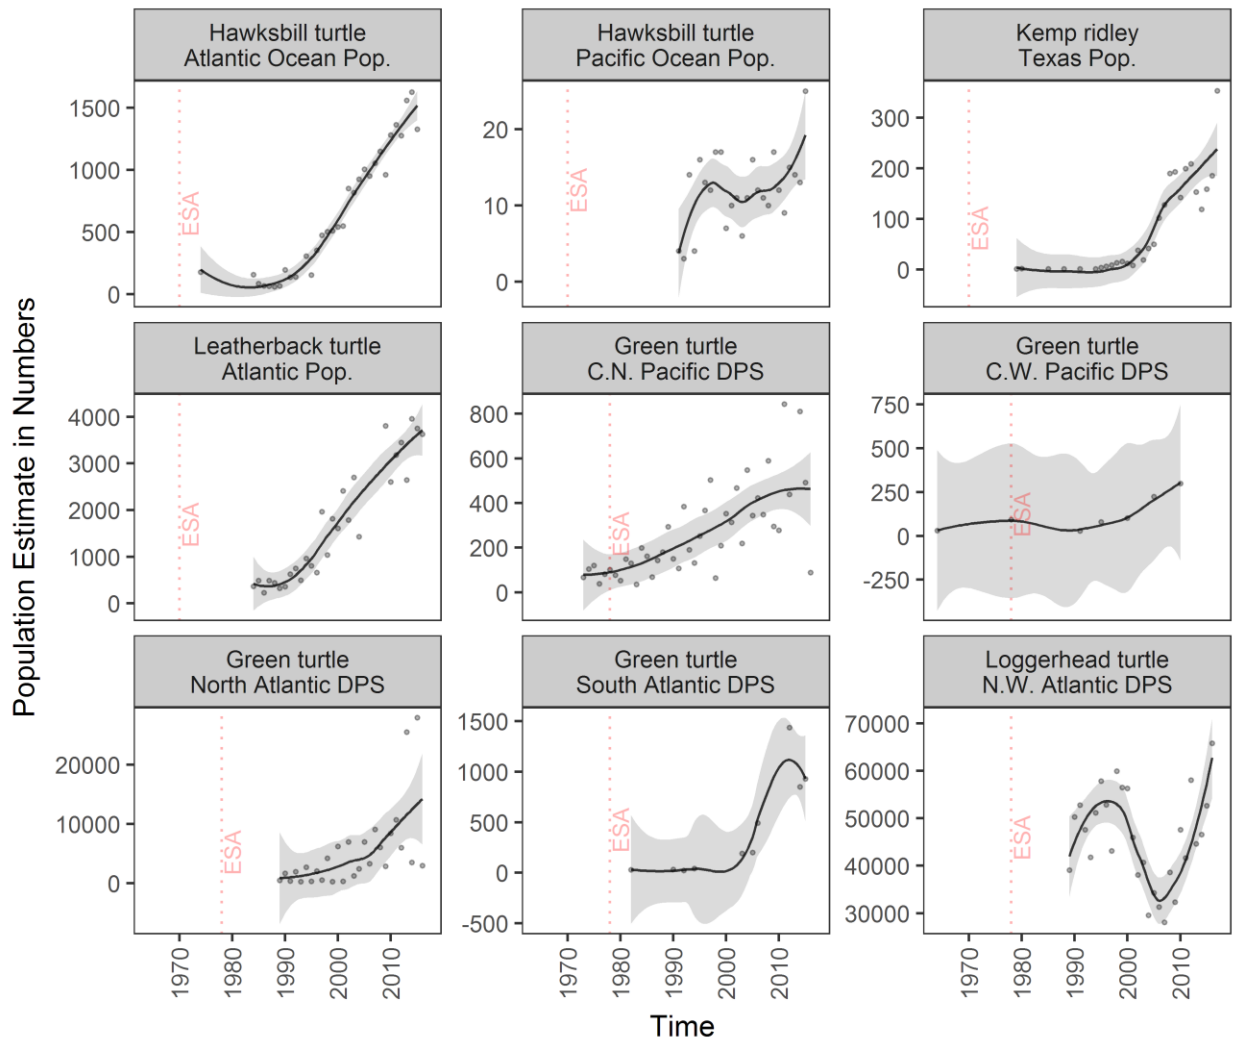

913
